# Supplementary material for: Variants of the Low Oxygen Sensors EGLN1 and HIF-1AN Associated with Acute Mountain Sickness
Source: MDPI journal article supplement (doi:10.3390/ijms151221777), 2014-11-26
Supplement: s1 [file s1]

## Supplementary Information

**Table S1.** Genetic model of single nucleotide polymorphisms and analysis of their association with acute mountain sickness (AMS).

| SNP Number | Model        | Genotype | AMS <sup>+</sup> [n (%)] | AMS <sup>-</sup> [n (%)] | OR (95% CI)      | <i>p</i> Value | AIC   | BIC   |
|------------|--------------|----------|--------------------------|--------------------------|------------------|----------------|-------|-------|
| rs1054399  | Codominant   | CC       | 156 (82.5%)              | 158 (83.2%)              | 1.00             | —              | —     | —     |
|            |              | CT       | 30 (15.9%)               | 28 (14.7%)               | 0.91 (0.52–1.60) | —              | —     | —     |
|            |              | TT       | 3 (1.6%)                 | 4 (2.1%)                 | 0.96 (0.19–4.86) | 0.95           | 537.8 | 569.3 |
|            | Dominant     | CC       | 156 (82.5%)              | 158 (83.2%)              | 1.00             | —              | —     | —     |
|            |              | CT + TT  | 33 (17.5%)               | 32 (16.8%)               | 1.79 (1.13–2.84) | 0.75           | 535.8 | 563.3 |
|            | Recessive    | CC + CT  | 186 (98.4%)              | 186 (97.9%)              | 1.00             | —              | —     | —     |
|            |              | TT       | 3 (1.6%)                 | 4 (2.1%)                 | 0.98 (0.52–1.60) | 0.98           | 535.9 | 563.4 |
|            | Overdominant | CC + TT  | 159 (84.1%)              | 162 (85.3%)              | 1.00             | —              | —     | —     |
|            |              | CT       | 30 (15.9%)               | 28 (14.7%)               | 0.91 (0.52–1.60) | 0.75           | 535.8 | 563.3 |
|            | Logadditive  | —        | —                        | —                        | 0.93 (0.58–1.50) | 0.78           | 535.8 | 563.3 |
| rs11190613 | Codominant   | TT       | 156 (82.1%)              | 158 (83.7%)              | 1.00             | —              | —     | —     |
|            |              | CT       | 31 (16.3%)               | 28 (14.7%)               | 0.88 (0.50–1.54) | —              | —     | —     |
|            |              | CC       | 3 (1.6%)                 | 3 (1.6%)                 | 0.96 (0.19–4.87) | 0.91           | 514.4 | 545.6 |
|            | Dominant     | TT       | 156 (82.1%)              | 159 (83.7%)              | 1.00             | —              | —     | —     |
|            |              | CT + CC  | 34 (17.9%)               | 31 (16.3%)               | 0.89 (0.52–1.52) | 0.67           | 512.7 | 540   |
|            | Recessive    | TT + CT  | 187 (98.4%)              | 187 (98.4%)              | 1.00             | —              | —     | —     |
|            |              | CC       | 3 (1.6%)                 | 3 (1.6%)                 | 0.98 (0.20–4.95) | 0.98           | 518.2 | 545.6 |
|            | Overdominant | TT + CC  | 159 (83.7%)              | 162 (85.3%)              | 1.00             | —              | —     | —     |
|            |              | CT       | 31 (16.3%)               | 28 (14.7%)               | 0.88 (0.57–1.46) | 0.66           | 518.8 | 546.1 |
|            | Logadditive  | —        | —                        | —                        | 0.91 (0.57–1.46) | 0.7            | 513.6 | 540.9 |
| rs11816840 | Codominant   | GG       | 156 (82.1%)              | 159 (83.7%)              | 1.00             | —              | —     | —     |
|            |              | CG       | 31 (16.3%)               | 28 (14.7%)               | 0.88 (0.50–1.54) | —              | —     | —     |
|            |              | CC       | 3 (1.6%)                 | 3 (1.6%)                 | 0.96 (0.19–4.87) | 0.82           | 537.3 | 568.8 |
|            | Dominant     | GG       | 156 (82.1%)              | 159 (83.7%)              | 1.00             | —              | —     | —     |
|            |              | CG + CC  | 34 (17.9%)               | 31 (16.3%)               | 0.89 (0.52–1.52) | 0.76           | 535.6 | 563.1 |
|            | Recessive    | GG + CG  | 187 (98.9%)              | 187 (98.4%)              | 1.00             | —              | —     | —     |
|            |              | CC       | 2 (1.1%)                 | 3 (1.6%)                 | 0.98 (0.20–4.95) | 0.65           | 535.4 | 563   |
|            | Overdominant | GG + CC  | 159 (83.7%)              | 162 (85.3%)              | 1.00             | —              | —     | —     |
|            |              | CG       | 31 (16.3%)               | 28 (14.7%)               | 0.88 (0.57–1.46) | 0.64           | 535.4 | 563   |
|            | Logadditive  | —        | —                        | —                        | 0.96 (0.50–1.53) | 0.88           | 535.6 | 563.2 |

Table S1. *Cont.*

| SNP Number | Model        | Genotype | AMS <sup>+</sup> [n (%)] | AMS <sup>-</sup> [n (%)] | OR (95% CI)      | <i>p</i> Value | AIC   | BIC   |
|------------|--------------|----------|--------------------------|--------------------------|------------------|----------------|-------|-------|
| rs3750633  | Codominant   | GG       | 156 (82.5%)              | 159 (83.6%)              | 1.00             | —              | —     | —     |
|            |              | AG       | 30 (15.9%)               | 28 (14.8%)               | 0.91 (0.52–1.60) | —              | —     | —     |
|            |              | AA       | 3 (1.6%)                 | 3 (1.6%)                 | 0.96 (0.19–4.86) | 0.95           | 535.8 | 563.3 |
|            | Dominant     | GG       | 156 (82.5%)              | 159 (83.6%)              | 1.00             | —              | —     | —     |
|            |              | AG + AA  | 33 (17.5%)               | 31 (16.3%)               | 0.92 (0.53–1.57) | 0.75           | 533.8 | 557.4 |
|            | Recessive    | GG + AG  | 186 (98.4%)              | 186 (98.4%)              | 1.00             | —              | —     | —     |
|            |              | AA       | 3 (1.6%)                 | 3 (1.6%)                 | 0.98 (0.19–4.92) | 0.98           | 533.9 | 557.5 |
|            | Overdominant | GG + AA  | 159 (84.1%)              | 161 (85.3%)              | 1.00             | —              | —     | —     |
|            |              | AG       | 30 (15.9%)               | 28 (14.8%)               | 0.91 (0.52–1.60) | 0.75           | 533.8 | 557.4 |
|            | Logadditive  | —        | —                        | —                        | 0.93 (0.58–1.50) | 0.78           | 553.8 | 557.4 |
| rs11292    | Codominant   | TT       | 156 (82.1%)              | 159 (83.6%)              | 1.00             | —              | —     | —     |
|            |              | CT       | 30 (16.3%)               | 28 (14.8%)               | 0.88 (0.50–1.54) | —              | —     | —     |
|            |              | CC       | 3 (1.6%)                 | 3 (1.6%)                 | 0.96 (0.19–4.86) | 0.91           | 537   | 564.6 |
|            | Dominant     | TT       | 156 (82.1%)              | 158 (83.6%)              | 1.00             | —              | —     | —     |
|            |              | CT + CC  | 33 (17.9%)               | 31 (16.4%)               | 0.89 (0.52–1.52) | 0.67           | 535   | 558.7 |
|            | Recessive    | TT + CT  | 187 (98.4%)              | 186 (98.4%)              | 1.00             | —              | —     | —     |
|            |              | CC       | 3 (1.6%)                 | 3 (1.6%)                 | 0.98 (0.20–4.95) | 0.98           | 535.2 | 558.8 |
|            | Overdominant | TT + CC  | 159 (83.7%)              | 161 (85.2%)              | 1.00             | —              | —     | —     |
|            |              | CT       | 31 (16.3%)               | 28 (14.8%)               | 0.88 (0.50–1.54) | 0.66           | 535   | 558.6 |
|            | Logadditive  | —        | —                        | —                        | 0.91 (0.57–1.46) | 0.7            | 553.1 | 558.7 |
| rs2009873  | Codominant   | AA       | 72 (38.3%)               | 60 (31.8%)               | 1.00             | —              | —     | —     |
|            |              | AG       | 85 (45.2%)               | 87 (46%)                 | 1.23 (0.78–1.95) | —              | —     | —     |
|            |              | GG       | 31 (16.5%)               | 42 (22.2%)               | 1.61 (0.91–2.87) | 0.26           | 532.5 | 564   |
|            | Dominant     | AA       | 72 (38.3%)               | 60 (31.8%)               | 1.00             | —              | —     | —     |
|            |              | AG + GG  | 116 (61.7%)              | 129 (68.2%)              | 1.34 (0.87–2.04) | 0.18           | 531.4 | 559   |
|            | Recessive    | AA + AG  | 157 (83.5%)              | 147 (77.8%)              | 1.00             | —              | —     | —     |
|            |              | GG       | 31 (16.5%)               | 42 (22.2%)               | 1.43 (0.86–2.40) | 0.17           | 531.3 | 558.8 |
|            | Overdominant | AA + GG  | 103 (54.8%)              | 102 (54%)                | 1.00             | —              | —     | —     |
|            |              | AG       | 85 (45.2%)               | 87 (46%)                 | 1.04 (0.69–1.56) | 0.85           | 533.2 | 560.7 |
|            | Logadditive  | —        | —                        | —                        | 1.26 (0.95–1.68) | 0.1            | 530.5 | 558.1 |

Table S1. *Cont.*

| SNP Number | Model        | Genotype | AMS <sup>+</sup> [n (%)] | AMS <sup>-</sup> [n (%)] | OR (95% CI)      | <i>p</i> Value | AIC   | BIC   |
|------------|--------------|----------|--------------------------|--------------------------|------------------|----------------|-------|-------|
| rs2486729  | Codominant   | AA       | 73 (38.4%)               | 61 (32.5%)               | 1.00             | –              | –     | –     |
|            |              | AG       | 84 (44.2%)               | 84 (44.7%)               | 1.23 (0.78–1.95) | –              | –     | –     |
|            |              | GG       | 33 (17.4%)               | 43 (22.9%)               | 1.57 (0.89–2.78) | 0.29           | 534   | 565.5 |
|            | Dominant     | AA       | 73 (38.4%)               | 61 (32.5%)               | –                | –              | –     | –     |
|            |              | AG + GG  | 117 (61.6%)              | 127 (67.5%)              | 1.33 (0.87–2.03) | 0.19           | 532.8 | 560.4 |
|            | Recessive    | AA + AG  | 157 (82.6%)              | 145 (77.1%)              | –                | –              | –     | –     |
|            |              | GG       | 33 (17.4%)               | 43 (22.9%)               | 1.40 (0.84–2.33) | 0.19           | 532.8 | 560.4 |
|            | Overdominant | AA + GG  | 106 (55.8%)              | 104 (55.3%)              | –                | –              | –     | –     |
|            |              | AG       | 84 (44.2%)               | 84 (44.7%)               | 1.05 (0.70–1.57) | 0.83           | 534.5 | 562   |
|            | Logadditive  | –        | –                        | –                        | 1.25 (0.95–1.65) | 0.11           | 532   | 559.6 |
| rs2739513  | Codominant   | AA       | 71 (38.4%)               | 62 (33.7%)               | 1.00             | –              | –     | –     |
|            |              | AG       | 84 (45.4%)               | 80 (43.5%)               | 1.10 (0.70–1.75) | –              | –     | –     |
|            |              | GG       | 30 (16.2%)               | 42 (22.8%)               | 1.59 (0.89–2.84) | 0.28           | 521   | 548.3 |
|            | Dominant     | AA       | 71 (38.4%)               | 62 (33.7%)               | 1.00             | –              | –     | –     |
|            |              | AG + GG  | 114 (61.6%)              | 122 (66.3%)              | 1.23 (0.81–1.89) | 0.33           | 520.6 | 544.1 |
|            | Recessive    | AA + AG  | 155 (83.8%)              | 142 (77.2%)              | 1.00             | –              | –     | –     |
|            |              | GG       | 30 (16.2%)               | 42 (22.8%)               | 1.51 (0.89–2.54) | 0.12           | 519.1 | 542.6 |
|            | Overdominant | AA + GG  | 101 (54.6%)              | 104 (56.5%)              | 1.00             | –              | –     | –     |
|            |              | AG       | 84 (45.4%)               | 80 (43.5%)               | 0.94 (0.62–1.42) | 0.77           | 521.5 | 544.9 |
|            | Logadditive  | –        | –                        | –                        | 1.24 (0.93–1.64) | 0.14           | 519.3 | 542.8 |

Numbers and frequencies of AMS<sup>+</sup> or AMS<sup>-</sup> in each genotype were shown; SNP: Single nucleotide polymorphism; AMS: Acute mountain sickness; AIC: Akaike's information criterion; and BIC: Bayesian information criterion.
